# Erratum: “The Influence of Modeling Separate Neuromuscular Compartments on the Force and Moment Generating Capacities of Muscles of the Feline Hindlimb” [J. Biomech. Eng., 2010, 132, p. 081003]

Lisa N. MacFadden and Nicholas A. T. Brown

Figures 3–5 were printed with errors. The correct figure titles and axis labels are reprinted herein. There were no errors in the data reproduced in these figures.

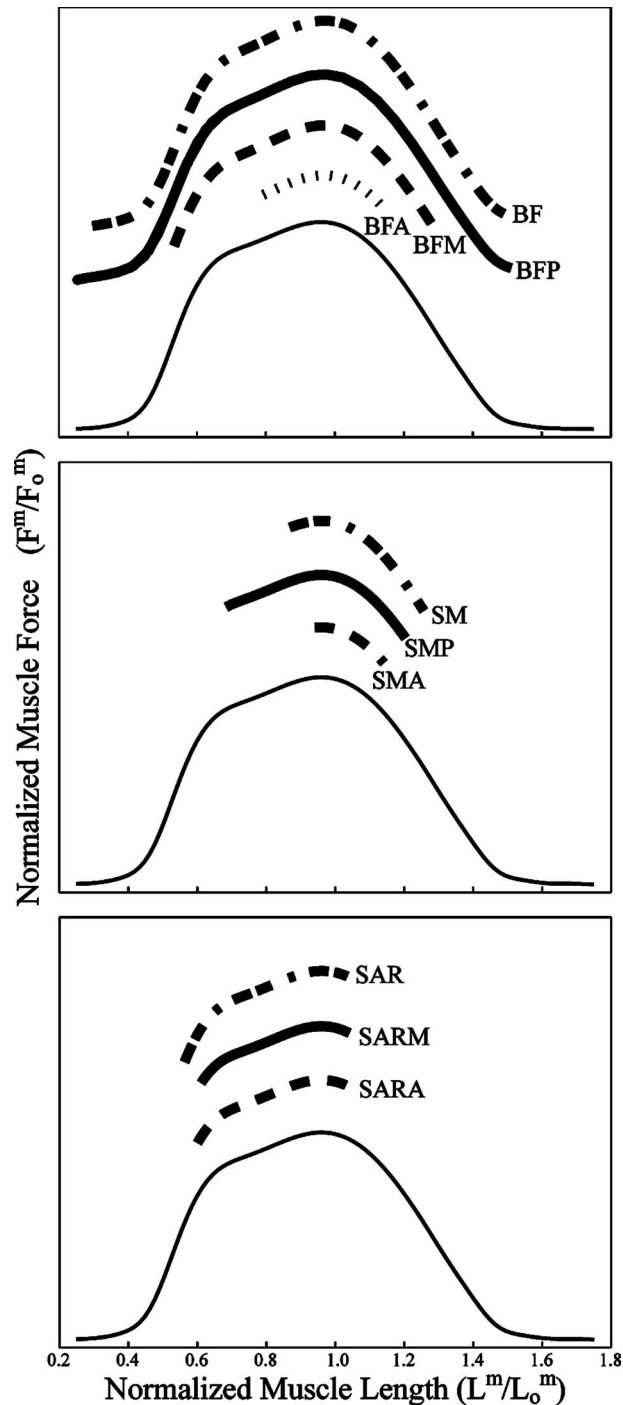

Fig. 3

Knee Moment, N-m  
Knee extension is positive, Knee flexion is negative

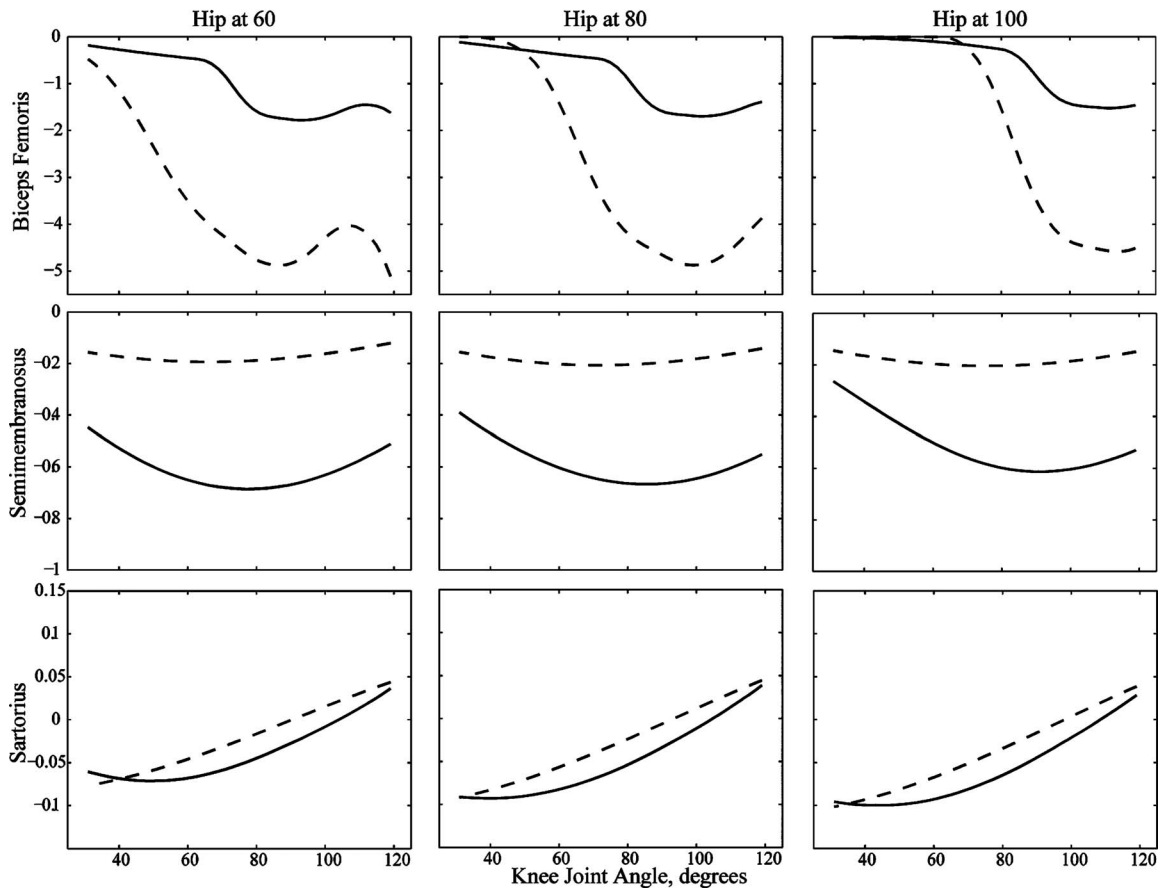

Fig. 4

Hip Moment, N-m  
Hip extension is positive, Hip flexion is negative

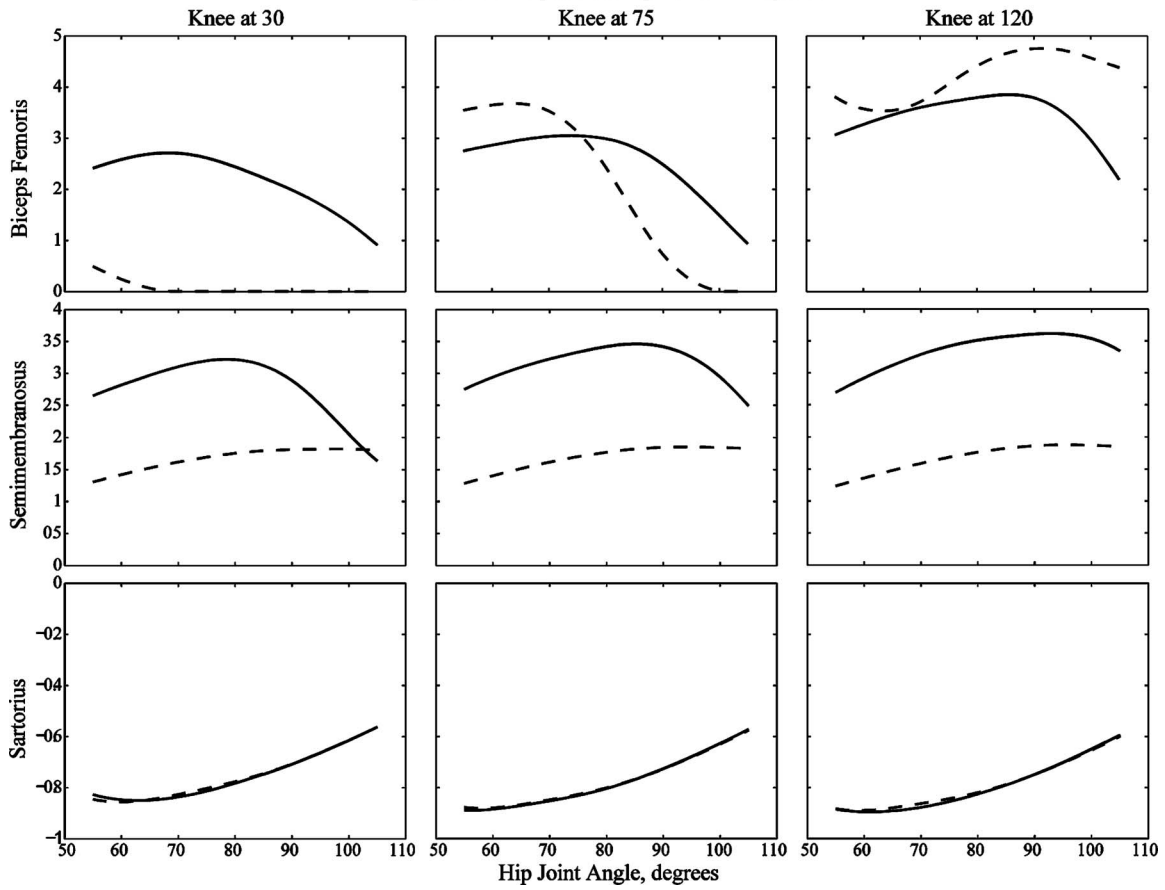

Fig. 5
